# Supplementary material for: Chitosan gel vaccine protects against tumour growth in an intracaecal mouse model of cancer by modulating systemic immune responses
Source: Springer Nature journal article supplement (doi:10.1186/s12865-016-0178-4), 2016-10-18
Supplement: MOESM1 [file 10899028]

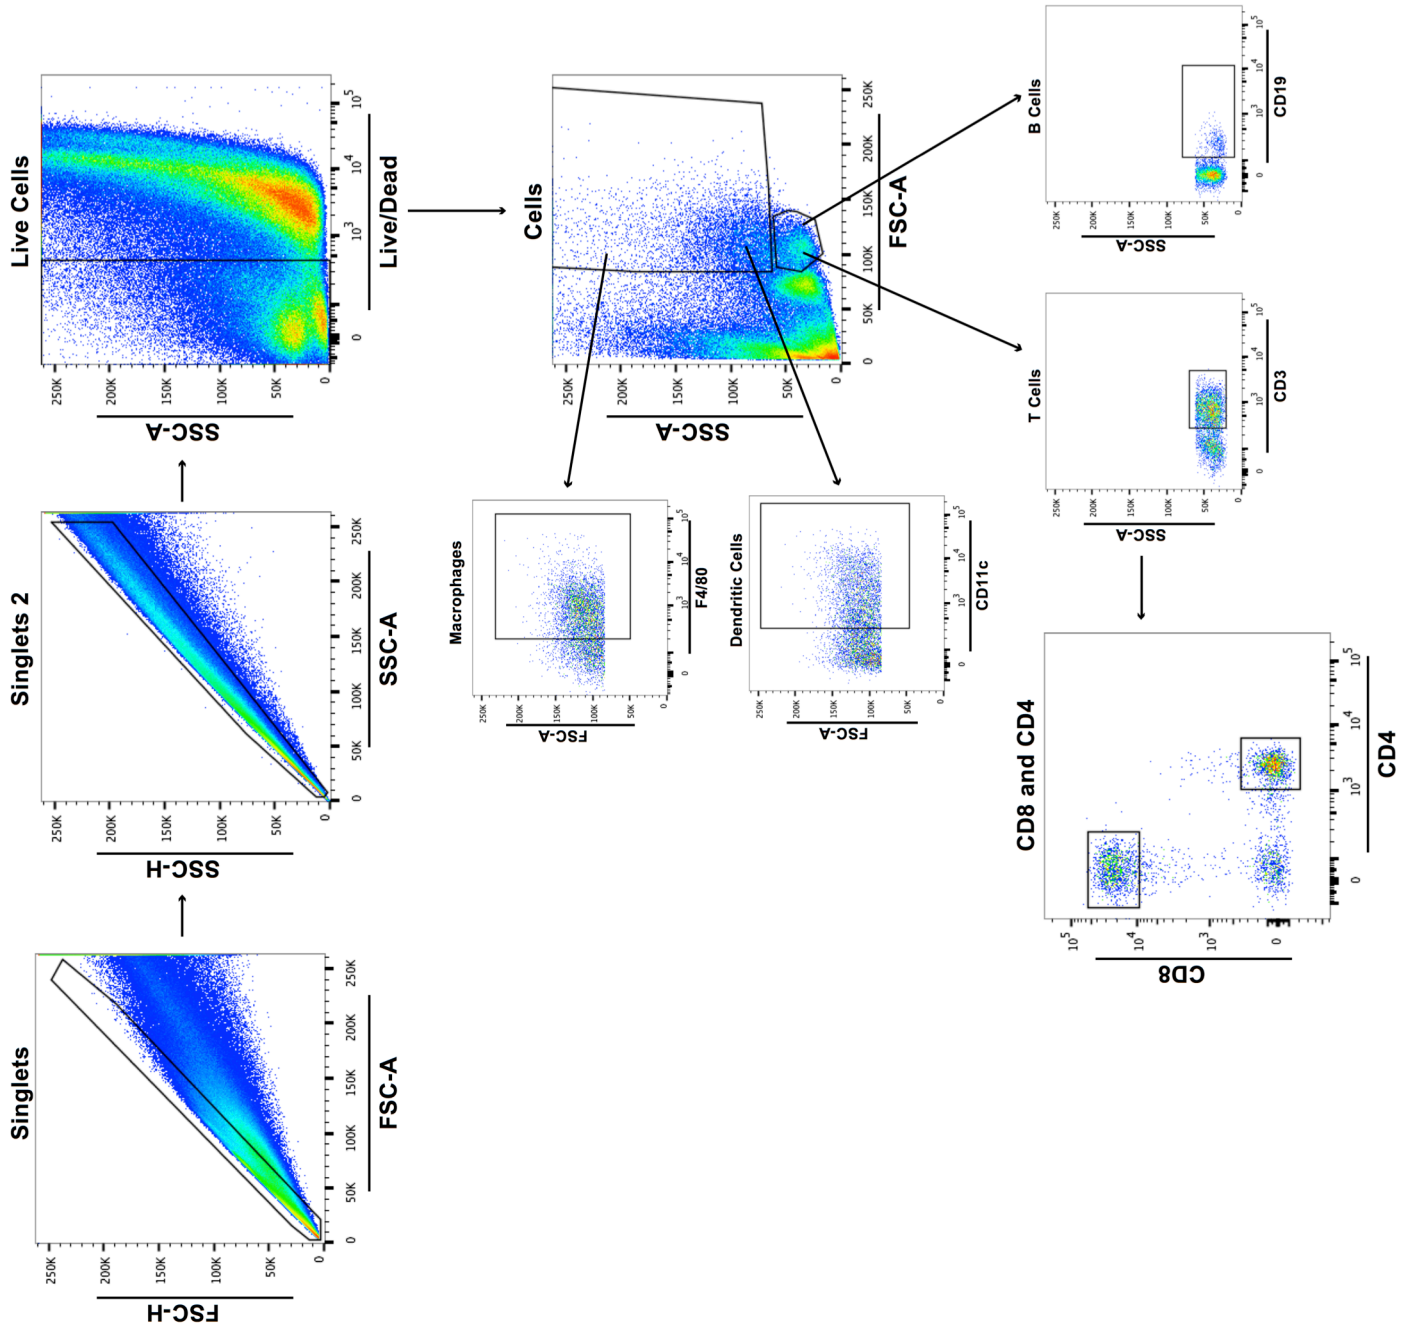

Highton et al  
 SUPPLEMENTARY  
 FIGURE 1
